# Supplementary material
Source: PubMed Central journal article supplement (PMC2755661)
Supplement: supp_M109.014399_jbc.M109.014399-1.pdf [file supp_M109.014399_jbc.M109.014399-1.pdf]

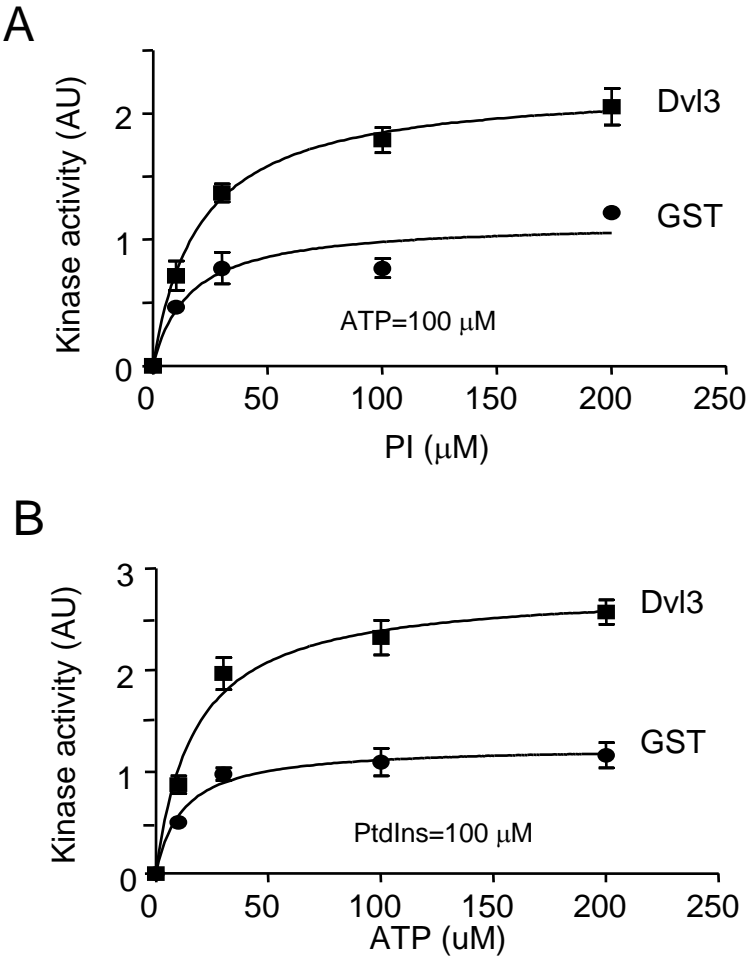

**Figure S1. Representative kinase assays for Fig. 3B (A) and Fig. 3C (B).** In these assays, 50 nM PI4KII $\alpha$  was used with 100 nM Dvl or GST.

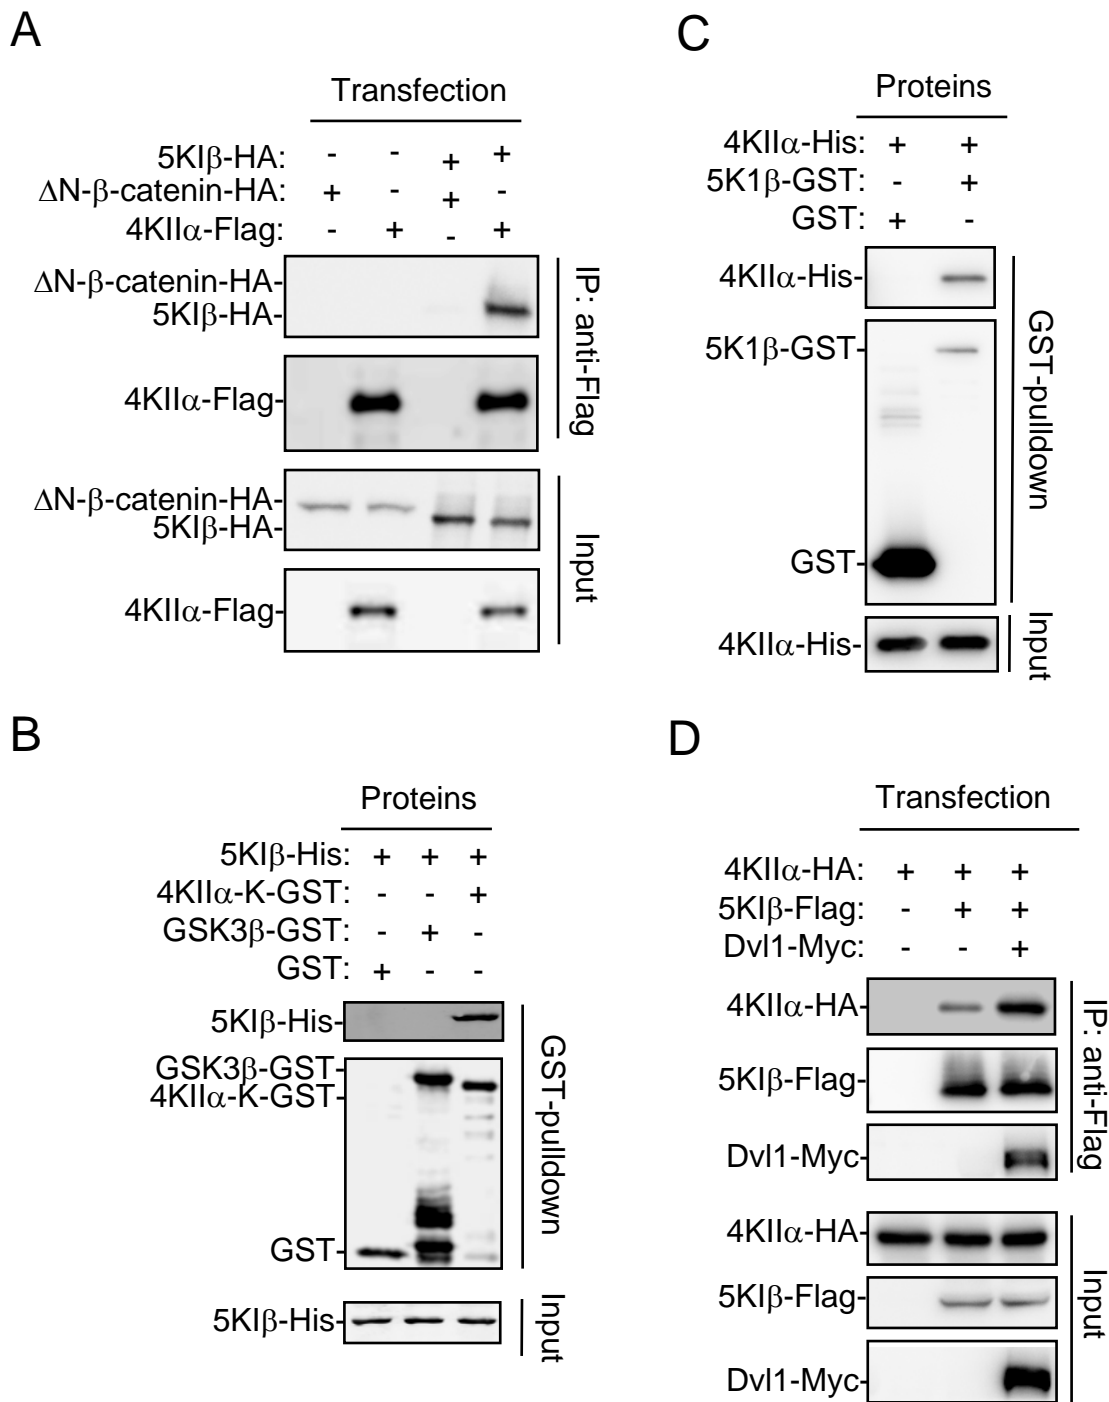

**Figure S2. Interactions of Dvl, PI4KII $\alpha$  and PIP5KI $\beta$ .**

(A) Coimmunoprecipitation of PI4KII $\alpha$  and PIP5KI $\beta$  in transfected HEK293T cells.  $\Delta$ N- $\beta$ -catenin-HA was used as a control.

(B,C) Direct interaction of purified recombinant PI4KII $\alpha$  and PIP5KI $\beta$  proteins in an *in vitro* pull-down assay. GST and GSK3 $\beta$ -GST were used as a control.

(D) Effect of overexpression of Dvl1 on coimmunoprecipitation of PI4KII $\alpha$  and PIP5KI $\beta$  in transiently transfected HEK293T cells.
